# Supplementary material for: Mobile Health Usage, Preferences, Barriers, and eHealth Literacy in Rheumatology: Patient Survey Study
Source: PubMed Central journal article supplement (PMC7450373; doi:10.2196/19661), 2020-08-12
Supplement: mhealth_v8i8e19661_app1.pdf [file mhealth_v8i8e19661_app1.pdf]

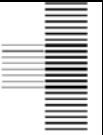

Pat. Nr.: \_\_\_\_\_

Datum: \_\_\_\_ - \_\_\_\_ - \_\_\_\_  
Tag Monat Jahr

**Liebe Patientinnen und Patienten, vielen Dank für Ihre Unterstützung!!  
Bitte schreiben Sie leserlich in großen DRUCKBUCHSTABEN und füllen den  
Fragebogen komplett aus. Bitte überspringen Sie keine Fragen! Bei Fragen können Sie  
sich jederzeit an einen Mitarbeiter wenden!**

**Demographische Daten**

1. **Alter:** \_\_\_\_\_ **Geschlecht:**  männlich  weiblich
2. **Rheumatologische Erkrankung:** \_\_\_\_\_
3. **Wie aktiv ist die Krankheit im Moment (Patient Global)?**  
unwichtig/0    1    2    3    4    5    6    7    8    9    sehr wichtig/10
4. **Jahr der Erstdiagnose:** \_\_\_\_\_
5. **Was ist Ihr höchster Bildungsabschluss?**  
 Lehre/ Berufsausbildung     Ohne beruflichen Bildungsabschluss  
 Fachhochschulabschluss     Bildungsabschluss noch nicht beendet  
 Universitätsabschluss
6. **Bitte geben Sie die Größe Ihres Wohnorts an:**  
 Dorf     mittelgroße Stadt  
 kleine Stadt     große Stadt

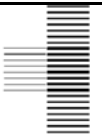

Pat. Nr.: \_\_\_\_\_

Datum: \_\_\_\_ - \_\_\_\_ - \_\_\_\_  
Tag Monat Jahr**E-Health Nutzung****7. Benutzen Sie regelmäßig elektronische Geräte?**

- Smartphone (iPhone etc.)       elek. Tracking Geräte (z.B. Fitnessarmbänder)  
 Tablet (iPad etc.)       weitere: \_\_\_\_\_

**8. Nutzen Sie soziale Netzwerke (Facebook, Instagram, Twitter, etc.)?**

- Ja       Nein

**9. Haben Sie schon mal Informationen über Gesundheitsthemen im Internet gesucht? (Mehrfachauswahl)**

- Ja        Diagnosen  
 Symptome  
 Medikamente  
 Behandlungsmöglichkeiten  
 Ärzte  
 Patientenforen  
 Krankheitsspezifische Websites  
 Sonstiges: \_\_\_\_\_
- Nein        Ich weiß nicht wie man diese Informationen im Internet sucht  
 Ich habe keinen PC / Smartphone / Internetzugang  
 Die Informationen von meinem Arzt waren ausreichend  
 Ich denke nicht, dass mir das helfen würde.  
 Sonstiges: \_\_\_\_\_

**10. Wenn ja wie häufig nutzen Sie das Internet für med. Informationen?**

- täglich     wöchentlich     monatlich     seltener     gar nicht

**11. Haben Sie mit einem behandelnden Arzt schon mal per E-Mail kommuniziert?**

- Ja       Nein

**12. Haben Sie schon mal ein Patientenforum genutzt und... (Mehrfachauswahl)?**

- einen aktiven Beitrag verfasst       sich mit anderen Patienten ausgetauscht  
 Beiträge gelesen       weder noch

**13. Haben Sie schon mal an einem medizinischen Online Programm teilgenommen (Rauchentwöhnung, Stressreduktion, Schmerzreduktion)?**

- Ja       Nein

**14. Kennen Sie die Website der deutschen Gesellschaft für Rheumatologie (DGRh) mit den Medikamenteninformationen für Patienten und Ärzte?**

- Ja       Nein



Pat. Nr.: \_\_\_\_\_

Datum: \_\_\_\_ - \_\_\_\_ - \_\_\_\_  
Tag Monat Jahr

**15. Kennen Sie hilfreiche rheumaspezifische digitale Angebote (Websites/Apps)?**

- Ja, z.B. \_\_\_\_\_  
 Nein

**16. Wie oft haben Sie folgende Möglichkeiten innerhalb der letzten 3 Monate genutzt um Gesundheitsinformationen zu erhalten?**

Bitte markieren Sie bei jeder Möglichkeit ihre Nutzung.

|                                        | täglich                  | wöchentlich              | monatlich                | seltener                 | gar nicht                |
|----------------------------------------|--------------------------|--------------------------|--------------------------|--------------------------|--------------------------|
| Internet                               | <input type="checkbox"/> | <input type="checkbox"/> | <input type="checkbox"/> | <input type="checkbox"/> | <input type="checkbox"/> |
| Medizinische Apps                      | <input type="checkbox"/> | <input type="checkbox"/> | <input type="checkbox"/> | <input type="checkbox"/> | <input type="checkbox"/> |
| Printmedien (Broschüren, Bücher, etc.) | <input type="checkbox"/> | <input type="checkbox"/> | <input type="checkbox"/> | <input type="checkbox"/> | <input type="checkbox"/> |
| medizinisches Fachpersonal             | <input type="checkbox"/> | <input type="checkbox"/> | <input type="checkbox"/> | <input type="checkbox"/> | <input type="checkbox"/> |
| Freunde / Bekannte / Familie           | <input type="checkbox"/> | <input type="checkbox"/> | <input type="checkbox"/> | <input type="checkbox"/> | <input type="checkbox"/> |

**App-Nutzung / Präferenzen**

**17. Welche medizinischen Apps nutzen Sie?**

- Keine  \_\_\_\_\_

**18. Wenn Sie med. Apps nutzen, wie häufig nutzen Sie diese medizinischen Apps?**

- täglich  wöchentlich  monatlich  seltener  gar nicht

**19. Kennen Sie die App „Arzneimittel aktuell“?**

- Ja  Nein

**20. Wie wichtig sind Ihnen bei einer medizinischen App folgende Punkte:**

Bitte markieren Sie bei jeder Aussage die Rubrik, die Ihre Meinung am besten beschreibt.

|                                               | unwichtig/0              | 1                        | 2                        | 3                        | 4                        | 5                        | 6                        | 7                        | 8                        | 9                        | sehr wichtig/10          |
|-----------------------------------------------|--------------------------|--------------------------|--------------------------|--------------------------|--------------------------|--------------------------|--------------------------|--------------------------|--------------------------|--------------------------|--------------------------|
| Datensicherheit                               | <input type="checkbox"/> | <input type="checkbox"/> | <input type="checkbox"/> | <input type="checkbox"/> | <input type="checkbox"/> | <input type="checkbox"/> | <input type="checkbox"/> | <input type="checkbox"/> | <input type="checkbox"/> | <input type="checkbox"/> | <input type="checkbox"/> |
| Design                                        | <input type="checkbox"/> | <input type="checkbox"/> | <input type="checkbox"/> | <input type="checkbox"/> | <input type="checkbox"/> | <input type="checkbox"/> | <input type="checkbox"/> | <input type="checkbox"/> | <input type="checkbox"/> | <input type="checkbox"/> | <input type="checkbox"/> |
| Benutzerfreundlichkeit                        | <input type="checkbox"/> | <input type="checkbox"/> | <input type="checkbox"/> | <input type="checkbox"/> | <input type="checkbox"/> | <input type="checkbox"/> | <input type="checkbox"/> | <input type="checkbox"/> | <input type="checkbox"/> | <input type="checkbox"/> | <input type="checkbox"/> |
| Interaktionsmöglichkeit/<br>Unterhaltungswert | <input type="checkbox"/> | <input type="checkbox"/> | <input type="checkbox"/> | <input type="checkbox"/> | <input type="checkbox"/> | <input type="checkbox"/> | <input type="checkbox"/> | <input type="checkbox"/> | <input type="checkbox"/> | <input type="checkbox"/> | <input type="checkbox"/> |



Pat. Nr.: \_\_\_\_\_

Datum: \_\_\_\_ - \_\_\_\_ - \_\_\_\_  
Tag Monat Jahr

**21. Ich glaube, dass der Einsatz von med. Apps hilfreich für mich sein kann**

- Ja  Nein

**22. Ich würde es gut finden, mit meinem Arzt auch per Online Videosprechstunde kommunizieren zu können**

- Ja  Nein

**eHealth Literarcy**

**23. Wie nützlich/hilfreich finden Sie das Internet, um Entscheidungen über Ihre Gesundheit zu treffen?**

- überhaupt nicht nützlich/hilfreich  nicht nützlich/hilfreich  unsicher  nützlich/hilfreich  sehr nützlich/hilfreich

**24. eHEALS-Fragebogen:**

| Bitte markieren Sie bei jeder Aussage die Rubrik, die Ihre Meinung am besten beschreibt.                                      |                          |                          |                          |                          |                          |
|-------------------------------------------------------------------------------------------------------------------------------|--------------------------|--------------------------|--------------------------|--------------------------|--------------------------|
|                                                                                                                               | trifft gar nicht zu      | trifft nicht zu          | neutral                  | trifft zu                | trifft voll zu           |
| Ich weiß, wie ich im Internet nützliche Gesundheitsinformationen finde.                                                       | <input type="checkbox"/> | <input type="checkbox"/> | <input type="checkbox"/> | <input type="checkbox"/> | <input type="checkbox"/> |
| Ich weiß, wie ich das Internet nutzen kann, um Antworten auf meine Fragen rund um das Thema Gesundheit zu bekommen.           | <input type="checkbox"/> | <input type="checkbox"/> | <input type="checkbox"/> | <input type="checkbox"/> | <input type="checkbox"/> |
| Ich weiß, welche Quellen für Gesundheitsinformationen im Internet verfügbar sind.                                             | <input type="checkbox"/> | <input type="checkbox"/> | <input type="checkbox"/> | <input type="checkbox"/> | <input type="checkbox"/> |
| Ich weiß, wo im Internet ich nützliche Gesundheitsinformationen finden kann.                                                  | <input type="checkbox"/> | <input type="checkbox"/> | <input type="checkbox"/> | <input type="checkbox"/> | <input type="checkbox"/> |
| Ich weiß, wie ich Informationen aus dem Internet so nutzen kann, dass sie mir weiterhelfen.                                   | <input type="checkbox"/> | <input type="checkbox"/> | <input type="checkbox"/> | <input type="checkbox"/> | <input type="checkbox"/> |
| Ich bin in der Lage, Informationen, die ich im Internet finde, kritisch zu bewerten.                                          | <input type="checkbox"/> | <input type="checkbox"/> | <input type="checkbox"/> | <input type="checkbox"/> | <input type="checkbox"/> |
| Ich kann im Internet zuverlässige von fragwürdigen Informationen unterscheiden.                                               | <input type="checkbox"/> | <input type="checkbox"/> | <input type="checkbox"/> | <input type="checkbox"/> | <input type="checkbox"/> |
| Wenn ich gesundheitsbezogene Entscheidungen auf Basis von Informationen aus dem Internet treffe, fühle ich mich dabei sicher. | <input type="checkbox"/> | <input type="checkbox"/> | <input type="checkbox"/> | <input type="checkbox"/> | <input type="checkbox"/> |



Pat. Nr.: \_\_\_\_\_

Datum: \_\_\_\_ - \_\_\_\_ - \_\_\_\_  
Tag      Monat      Jahr

**Kommunikationspräferenzen**

**Welche Angebote würden Sie gerne nutzen, um sich über Ihre Erkrankung zu informieren und Ihren Therapieplan (z.B. Tabletteneinnahme) gut einhalten zu können?**

**25. Erinnerungshilfen**

Bitte ordnen Sie die angegebenen Möglichkeiten nach dem für Sie zutreffenden Stellenwert von 1 (höchster Stellenwert) bis 6 (niedrigster Stellenwert) gemäß Ihrer eigenen Meinung!

An die regelmäßige Tabletteneinnahme möchte ich erinnert werden per...

- SMS \_\_\_\_\_
- Anruf \_\_\_\_\_
- E-Mail \_\_\_\_\_
- Push-Nachrichten in einer App \_\_\_\_\_
- gar nicht \_\_\_\_\_
- Postkarte \_\_\_\_\_

**26. Informationen zur Erkrankung und zur Behandlung**

Bitte ordnen Sie die angegebenen Möglichkeiten nach dem für Sie zutreffenden Stellenwert von 1 (höchster Stellenwert) bis 4 (niedrigster Stellenwert) gemäß Ihrer eigenen Meinung!

Ich bevorzuge medizinische Informationen...

- auf Papier gedruckt (z.B. Broschüren) \_\_\_\_\_
- keine Zusatzinformationen gewünscht \_\_\_\_\_
- in einer App \_\_\_\_\_
- auf einer Website \_\_\_\_\_

**27. Informationsvermittlung zur Erkrankung und zur Behandlung bei digitalen Angeboten**

Bitte ordnen Sie die angegebenen Möglichkeiten nach dem für Sie zutreffenden Stellenwert von 1 (höchster Stellenwert) bis 3 (niedrigster Stellenwert) gemäß Ihrer eigenen Meinung!

Bei digitalen Angeboten (Website/App) wären mir wichtig...

- Info Text und Bilder \_\_\_\_\_
- spielerisches Lernen \_\_\_\_\_
- Austausch mit anderen \_\_\_\_\_



Pat. Nr.: \_\_\_\_\_

Datum: \_\_\_\_ - \_\_\_\_ - \_\_\_\_  
Tag Monat Jahr

## 28. Dokumentation von Beschwerden und der Tabletteneinnahme

Bitte ordnen Sie die angegebenen Möglichkeiten nach dem für Sie zutreffenden Stellenwert von 1 (höchster Stellenwert) bis 4 (niedrigster Stellenwert) gemäß Ihrer eigenen Meinung!

Angaben zu meinem Befinden und zur Tabletteneinnahme würde ich in einem vorbereiteten Formular („Patiententagebuch“) dokumentieren...

- auf Papier gedruckt \_\_\_\_\_
- in einer App \_\_\_\_\_
- auf einer passwortgeschützten Website \_\_\_\_\_
- gar nicht \_\_\_\_\_

## 29. Bei digitalen Angeboten (Website/App) wäre mir wichtig zu sehen, wie gut ich im Vergleich zu anderen Patienten den Therapieplan einhalte

- wäre interessant zu wissen  interessiert mich nicht

## 30. Rückfrage-Möglichkeiten

Bitte ordnen Sie die angegebenen Möglichkeiten nach dem für Sie zutreffenden Stellenwert von 1 (höchster Stellenwert) bis 4 (niedrigster Stellenwert) gemäß Ihrer eigenen Meinung!

Mit Fragen zu Beschwerden und zur Behandlung würde ich mich zwischen den Untersuchungsterminen gerne an die Ambulanz/ einen Arzt wenden mittels

- Telefon \_\_\_\_\_
- E-Mail \_\_\_\_\_
- Website / Chat \_\_\_\_\_
- Keine Rückfragemöglichkeiten gewünscht \_\_\_\_\_

## 31. Datenübermittlung an Arzt per App

Würden Sie eine mobile App befürworten und Ihrem behandelnden Arzt Daten (Blutbild, Röntgenbilder, Arztbriefe etc.) zu Ihrer Erkrankung per App auf sicherem Weg zukommen lassen und Daten schnell zu erhalten?

- Ja  
 Nein →

(Mehrfachauswahl möglich)

- Ich habe keine passenden Endgeräte
- Ich kenne mich nicht mit der Technik aus
- Ich weiß nicht, was mit den Daten passiert
- Ich weiß nicht, wo die Daten gespeichert werden
- Ich befürchte keine gesicherte Datenübertragung
- Datenschutzgründe
- Ich möchte ausschließlich persönlichen Kontakt zum Arzt
- Ich halte es nicht für sinnvoll
- Andere Gründe: \_\_\_\_\_



Pat. Nr.: \_\_\_\_\_

Datum: \_\_\_\_ - \_\_\_\_ - \_\_\_\_  
Tag Monat Jahr

**32. Wären Sie bereit eine aktive Dateneingabe (z.B. zu Lebensqualität, Gelenkstatus, etc.) über die App zu machen?**

Ja **→ Wie oft wären Sie zur aktiven Dateneingabe bereit?**

- |                                        |                                        |
|----------------------------------------|----------------------------------------|
| <input type="checkbox"/> täglich       | <input type="checkbox"/> wöchentlich   |
| <input type="checkbox"/> monatlich     | <input type="checkbox"/> alle 3 Monate |
| <input type="checkbox"/> alle 6 Monate | <input type="checkbox"/> jährlich      |

**→ Wie viel Zeit würden Sie für die Dateneingaben aufwenden?**

- |                                           |                                       |
|-------------------------------------------|---------------------------------------|
| <input type="checkbox"/> bis zu 5 Minuten | <input type="checkbox"/> 5-15 Minuten |
| <input type="checkbox"/> 15-30 Minuten    | <input type="checkbox"/> länger       |

Nein

**33. Würden Sie sich eine direkte Kontaktaufnahme bei Unregelmäßigkeiten Ihrer Eingaben (z.B. bei auffälligen Laborwerten, Gelenkstatus, starken Nebenwirkungen, etc.) wünschen?**

Ja  Nein

**34. Fänden Sie es gut, wenn Ihr betreuender Arzt bereits vor der Nachsorgeuntersuchung die eingegebenen Daten (Nebenwirkungen, Lebensqualität, Laborwerte) vorliegen hätte?**

Ja  Nein, weil \_\_\_\_\_

**35. Würden Sie einer Verwendung Ihrer anonymisierten<sup>1</sup> oder pseudonymisierten<sup>1</sup> Daten zu Forschungszwecken (Verbesserung von Therapiemöglichkeiten, etc.) zustimmen?**

Ja  Nein, weil \_\_\_\_\_

**36. Ich würde die Patientenfragebögen auch gerne schon vor dem Termin per Internet/ PC/ Smartphone etc. ausfüllen können**

Ja  Nein

**37. Würden Sie offizielle Empfehlungen der deutschen Gesellschaft für Rheumatologie (DGRh) bezüglich Apps begrüßen?**

Ja  Nein

**38. Ich wäre bereit auf einen Arztbrief in Papierform zu verzichten und „nur“ eine elektronische Version (z.B. als pdf) zu erhalten**

Ja  Nein

**39. Haben Sie weitere Vorschläge oder Ideen: \_\_\_\_\_**

<sup>1</sup>Anonymisierung / Pseudonymisierung: Die Anonymisierung ist das Verändern personenbezogener Daten derart, dass diese Daten nicht mehr einer Person zugeordnet werden können. Bei der Pseudonymisierung wird der Name durch ein Pseudonym (zumeist eine mehrstellige Buchstaben- oder Zahlenkombination) ersetzt, um die Identifizierung des Betroffenen auszuschließen. Die Pseudonymisierung ermöglicht – unter Zuhilfenahme eines „Schlüssels“ – die Zuordnung von Daten zu einer Person. Diese Zuordnung ist ohne diesen Schlüssel nicht oder nur schwer möglich, da Daten und Identifikationsmerkmale getrennt sind.

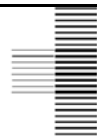

Pat. Nr.: \_\_\_\_\_

Datum: \_\_\_\_ - \_\_\_\_ - \_\_\_\_  
Tag Monat Jahr

**40. Wie sehr wären Sie an folgenden Funktionen einer rheumatologischen App interessiert?**

Bitte markieren Sie bei jeder Aussage die Rubrik, die Ihre Meinung am besten beschreibt.

|                                                                                                                      | interes<br>siert<br>mich<br>sehr | interes<br>siert<br>mich | neutral                  | interes<br>siert<br>mich<br>nicht | interes<br>siert<br>mich<br>gar<br>nicht |
|----------------------------------------------------------------------------------------------------------------------|----------------------------------|--------------------------|--------------------------|-----------------------------------|------------------------------------------|
| Visualisierung der Eingaben (Laborwerte, Verlauf, Nebenwirkungen, Krankheitsschübe, etc.)                            | <input type="checkbox"/>         | <input type="checkbox"/> | <input type="checkbox"/> | <input type="checkbox"/>          | <input type="checkbox"/>                 |
| Dokumentation via Fotos                                                                                              | <input type="checkbox"/>         | <input type="checkbox"/> | <input type="checkbox"/> | <input type="checkbox"/>          | <input type="checkbox"/>                 |
| Dokumentation von Gelenkstatus (geschwollene/ druckschmerzhaft Gelenke, Morgensteifigkeit, etc.)                     | <input type="checkbox"/>         | <input type="checkbox"/> | <input type="checkbox"/> | <input type="checkbox"/>          | <input type="checkbox"/>                 |
| Erinnerungsfunktion (Infusionstermin, Medikamentengabe, Impfungen, regulärer Termin, Ausfüllen von Fragebögen, etc.) | <input type="checkbox"/>         | <input type="checkbox"/> | <input type="checkbox"/> | <input type="checkbox"/>          | <input type="checkbox"/>                 |
| Mitteilungsmöglichkeit ob vor Infusionstermin ein Infekt vorliegt                                                    | <input type="checkbox"/>         | <input type="checkbox"/> | <input type="checkbox"/> | <input type="checkbox"/>          | <input type="checkbox"/>                 |
| Dokumentation von Medikamenten                                                                                       | <input type="checkbox"/>         | <input type="checkbox"/> | <input type="checkbox"/> | <input type="checkbox"/>          | <input type="checkbox"/>                 |
| Medikamenteninformationen/-warnungen (Nebenwirkungen, Wechselwirkungen, etc.)                                        | <input type="checkbox"/>         | <input type="checkbox"/> | <input type="checkbox"/> | <input type="checkbox"/>          | <input type="checkbox"/>                 |
| Informationen zu Ihrer Erkrankung                                                                                    | <input type="checkbox"/>         | <input type="checkbox"/> | <input type="checkbox"/> | <input type="checkbox"/>          | <input type="checkbox"/>                 |
| Informationen zu Ernährung, Sportübungen, etc.                                                                       | <input type="checkbox"/>         | <input type="checkbox"/> | <input type="checkbox"/> | <input type="checkbox"/>          | <input type="checkbox"/>                 |
| wissenschaftlich fundierte Online-Übungen zur Reduktion von Schmerzen und Bewältigung von Stress                     | <input type="checkbox"/>         | <input type="checkbox"/> | <input type="checkbox"/> | <input type="checkbox"/>          | <input type="checkbox"/>                 |
| elektronisches Rezept und elektronische AU-Bescheinigung                                                             | <input type="checkbox"/>         | <input type="checkbox"/> | <input type="checkbox"/> | <input type="checkbox"/>          | <input type="checkbox"/>                 |
| Abklärung von Symptomen und Diagnosevorschläge, mittels intelligentem Algorithmus                                    | <input type="checkbox"/>         | <input type="checkbox"/> | <input type="checkbox"/> | <input type="checkbox"/>          | <input type="checkbox"/>                 |
| Updates zu neuen wissenschaftlichen Erkenntnissen zu Ihrer Erkrankung und Medikamenten/-studien                      | <input type="checkbox"/>         | <input type="checkbox"/> | <input type="checkbox"/> | <input type="checkbox"/>          | <input type="checkbox"/>                 |
| Möglichkeit zum Austausch mit anderen Patienten                                                                      | <input type="checkbox"/>         | <input type="checkbox"/> | <input type="checkbox"/> | <input type="checkbox"/>          | <input type="checkbox"/>                 |
| passendes Equipment, z.B. Armband zur Datenerfassung der täglichen Bewegung (Schrittzähler), etc.                    | <input type="checkbox"/>         | <input type="checkbox"/> | <input type="checkbox"/> | <input type="checkbox"/>          | <input type="checkbox"/>                 |
| Dokumentation von Infekten                                                                                           | <input type="checkbox"/>         | <input type="checkbox"/> | <input type="checkbox"/> | <input type="checkbox"/>          | <input type="checkbox"/>                 |



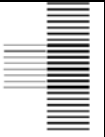

Pat. Nr.: \_\_\_\_\_

Datum: \_\_\_\_ - \_\_\_\_ - \_\_\_\_  
          Tag      Monat      Jahr
